# Supplementary material for: Why chemistry instructors are shifting to specifications grading: perceived benefits and challenges
Source: Royal Society of Chemistry journal article supplement (doi:10.1039/d5rp00035a), 2025-01-01
Supplement: d5rp00035a1.pdf [file d5rp00035a1.pdf]

## Supporting Information:

"Why Chemistry Instructors Are Shifting to Specifications Grading: Perceived Benefits and Challenges"

Ying Wang<sup>a†</sup>, Haleigh Machost<sup>a†</sup>, Brandon J. Yik<sup>b</sup>, & Marilyne Stains<sup>a\*</sup>

<sup>†</sup>Authors contributed equally to this work

<sup>a</sup>Department of Chemistry, University of Virginia, Charlottesville, VA, 22904, USA

<sup>b</sup>Department of Chemistry, University of Georgia, Athens, GA, 30602, USA

\*Corresponding author email: [mstains@virginia.edu](mailto:mstains@virginia.edu)

## Contents

|                                                                                                     |   |
|-----------------------------------------------------------------------------------------------------|---|
| Section A. Additional Participant Data .....                                                        | 2 |
| <b>Table S1.</b> Number of potential participants identified through each method .....              | 2 |
| <b>Table S2.</b> Carnegie classifications of participants' institutions .....                       | 2 |
| <b>Table S3.</b> Course characteristics of participants .....                                       | 2 |
| Section B. Summary of IRR process .....                                                             | 3 |
| <b>Table S4.</b> Summary of changes to the codebook during the interrater reliability process ..... | 3 |

## Section A. Additional Participant Data

**Table S1.** Number of potential participants identified through each method

| Potential participant identification | Potential participants identified |
|--------------------------------------|-----------------------------------|
| Conference abstracts                 | 26                                |
| Journal article publications         | 23                                |
| Snowball sampling                    | 14                                |
| Social media posts                   | 10                                |
| Online searches                      | 5                                 |
| Personal communications              | 4                                 |
| Book chapters                        | 3                                 |
| <b>Total</b>                         | <b>85</b>                         |

**Table S2.** Carnegie classifications of participants' institutions. Classifications include baccalaureate colleges and universities (BAC), master's colleges and universities – larger programs (M1), doctoral/professional universities (D/PU), doctoral universities – high level of research activity (R2), and doctoral universities – very high level of research activity (R1).

|              | BAC      | M1       | D/PU     | R2       | R1       | Total     |
|--------------|----------|----------|----------|----------|----------|-----------|
| Public       | 2        | 1        | -        | 2        | 6        | 11        |
| Private      | 7        | 1        | 2        | 2        | 1        | 13        |
| <b>Total</b> | <b>9</b> | <b>2</b> | <b>2</b> | <b>4</b> | <b>7</b> | <b>24</b> |

**Table S3.** Course characteristics of participants. If instructors taught more than one specifications-graded course, they were asked to describe the course of their first implementation.

|             | Enrollment         | Number of instructors |
|-------------|--------------------|-----------------------|
| Lab         | Small (<40)        | 0                     |
|             | Medium (40-150)    | 1                     |
|             | Large (150-1000)   | 2                     |
|             | Very large (>1000) | 2                     |
|             | <b>Total</b>       | <b>5</b>              |
| Lecture     | Small (<40)        | 4                     |
|             | Medium (40-150)    | 4                     |
|             | Large (150-1000)   | 2                     |
|             | Very large (>1000) | 1                     |
|             | <b>Total</b>       | <b>11</b>             |
| Lab-Lecture | Small (<40)        | 9                     |
|             | Medium (40-150)    | 3                     |
|             | Large (150-1000)   | 1                     |
|             | Very large (>1000) | 0                     |

|              |           |
|--------------|-----------|
| <b>Total</b> | <b>13</b> |
|--------------|-----------|

## Section B. Summary of IRR process

**Table S4.** Summary of changes to the codebook during the interrater reliability process

| <b>Iteration</b> | <b>Documents</b>                                 | <b>Summary of changes post-inter-rater analyses</b>                                                                                                                                                                                                                                                                                                                                                                                                                                                                                                                                                                                                                                              |
|------------------|--------------------------------------------------|--------------------------------------------------------------------------------------------------------------------------------------------------------------------------------------------------------------------------------------------------------------------------------------------------------------------------------------------------------------------------------------------------------------------------------------------------------------------------------------------------------------------------------------------------------------------------------------------------------------------------------------------------------------------------------------------------|
| Round 1          | 178, 179, 180, 184, 186, 188, 189, 192, 195, 197 | <ul style="list-style-type: none"> <li>• Clarified definition of ‘reduced student proficiency’</li> <li>• Clarified definition of ‘increased instructor workload’</li> <li>• Added to definition of ‘unfamiliar system for students’</li> <li>• Verbally clarified that challenges with training TAs falls under ‘increased instructor workload’</li> <li>• Changed ‘potential negative impact on instructor’ to be specific to career affects</li> <li>• Changed ‘lack of support’ to include damage professional relationships without any affect on career</li> <li>• Added a code ‘does not accommodate different groups of students’</li> <li>• Added a code ‘maintaining rigor’</li> </ul> |
| Round 2          | 102, 117, 118, 119, 120, 124, 125, 129, 145, 149 | <ul style="list-style-type: none"> <li>• Clarified the distinction between codes ‘unfamiliar system to students’ and ‘student resistance;’ correspondingly clarified the respective definitions</li> <li>• Clarified ‘increased tension between instructor and student’ to be tension as perceived by the instructor</li> <li>• Removed unused code ‘increased student engagement’</li> <li>• Incorporated the code ‘multiple opportunities to revise or retake’ into the code ‘increased flexibility’</li> </ul>                                                                                                                                                                                |
| Round 3          | 152, 153, 154, 163, 170, 171, 173, 174, 177      | <ul style="list-style-type: none"> <li>• No further changes</li> </ul>                                                                                                                                                                                                                                                                                                                                                                                                                                                                                                                                                                                                                           |
| Final Review     |                                                  | <ul style="list-style-type: none"> <li>• All instances of codes altered, as described above, were revisited to ensure consistency</li> </ul>                                                                                                                                                                                                                                                                                                                                                                                                                                                                                                                                                     |
